# Supplementary material for: The diversity and evolution of locomotor muscle properties in anurans
Source: Oxford University Press journal article supplement (doi:10.1242/jeb.142315), 2016-10-01
Supplement: jeb142315supp.pdf [file jeb142315supp.pdf]

**Table S1.** Means  $\pm$  standard deviations for all species and all variables. Values without a standard deviation were either derived from data pooled across individuals within a species (e.g.  $V_{max}$ ), or were set to fixed values (e.g. swimming duty factor of 0.5 for the undulation of the tiger salamander (*Ambystoma tigrinum*)).

[Click here to Download Table S1](#)

**Table S2.** Raw data for all species and trials. Blank entries indicate data which was absent due to experimental failure or animal mortality.

[Click here to Download Table S2](#)
